# Supplementary material for: Infliximab for Treatment of Immune Adverse Events and Its Impact on Tumor Response
Source: MDPI journal article supplement (doi:10.3390/cancers15215181), 2023-10-27
Supplement: s1 [file s1]

**Supplementary Table S1:** Presence of each adverse event for all patients in all subgroups of therapy and cancers

| AE              | All patients | Monotherapy | Combo ICI  | Melanoma patients (n=93) |              | GU cancer patients (n=37) |              |
|-----------------|--------------|-------------|------------|--------------------------|--------------|---------------------------|--------------|
|                 | (n=185)      | ICI (n=76)  | (n=109)    | Mono (n=24)              | Combo (n=69) | Mono (n=19)               | Combo (n=18) |
|                 | N (%)        | N (%)       | N (%)      | N (%)                    | N (%)        | N (%)                     | N (%)        |
| Colitis         | 121 (65.4%)  | 42 (55.3%)  | 79 (72.5%) | 18 (75%)                 | 57 (82.6%)   | 12 (63.2%)                | 12 (66.7%)   |
| Pneumonitis     | 29 (15.7%)   | 15 (19.7%)  | 14 (12.8%) | 1 (4.2%)                 | 4 (5.8%)     | 1 (5.3%)                  | 2 (11.1%)    |
| AIN             | 10 (5.4%)    | 5 (6.6%)    | 5 (4.6%)   | 1 (4.2%)                 | 4 (5.8%)     | 0 (0%)                    | 1 (5.6%)     |
| Myocarditis     | 9 (4.9%)     | 6 (7.9%)    | 3 (2.8%)   | 1 (4.2%)                 | 1 (1.4%)     | 4 (21.1%)                 | 2 (11.1%)    |
| Myositis        | 9 (4.9%)     | 4 (5.3%)    | 5 (4.6%)   | 0 (0%)                   | 1 (1.4%)     | 3 (15.8%)                 | 1 (5.6%)     |
| Encephalitis    | 6 (3.2%)     | 1 (1.3%)    | 5 (4.6%)   | 1 (4.2%)                 | 5 (7.2%)     | 0 (0%)                    | 0 (0%)       |
| Arthritis       | 2 (1.1%)     | 1 (1.3%)    | 1 (0.9%)   | 0 (0%)                   | 1 (1.4%)     | 0 (0%)                    | 0 (0%)       |
| Dermatitis      | 2 (1.1%)     | 1 (1.3%)    | 1 (0.9%)   | 1 (4.2%)                 | 0 (0%)       | 0 (0%)                    | 0 (0%)       |
| Neuritis        | 2 (1.1%)     | 0 (0%)      | 2 (1.8%)   | 0 (0%)                   | 2 (2.9%)     | 0 (0%)                    | 0 (0%)       |
| HLH             | 1 (0.5%)     | 1 (1.3%)    | 0 (0%)     | 0 (0%)                   | 0 (0%)       | 0 (0%)                    | 0 (0%)       |
| Necrolysis      | 1 (0.5%)     | 0 (0%)      | 1 (0.9%)   | 0 (0%)                   | 0 (0%)       | 0 (0%)                    | 0 (0%)       |
| Neuritis        | 1 (0.5%)     | 0 (0%)      | 1 (0.9%)   | 0 (0%)                   | 1 (1.4%)     | 0 (0%)                    | 0 (0%)       |
| Uveitis         | 1 (0.5%)     | 1 (1.3%)    | 0 (0%)     | 1 (4.2%)                 | 0 (0%)       | 0 (0%)                    | 0 (0%)       |
| Arthralgia      | 1 (0.5%)     | 1 (1.3%)    | 0 (0%)     | 1 (4.2%)                 | 0 (0%)       | 0 (0%)                    | 0 (0%)       |
| Papillitis      | 1 (0.5%)     | 1 (1.3%)    | 0 (0%)     | 0 (0%)                   | 0 (0%)       | 1 (5.3%)                  | 0 (0%)       |
| Mucositis       | 1 (0.5%)     | 1 (1.3%)    | 0 (0%)     | 1 (4.2%)                 | 0 (0%)       | 0 (0%)                    | 0 (0%)       |
| Neurotoxicity   | 1 (0.5%)     | 1 (1.3%)    | 0 (0%)     | 1 (4.2%)                 | 0 (0%)       | 0 (0%)                    | 0 (0%)       |
| Pancreatitis    | 1 (0.5%)     | 0 (0%)      | 1 (0.9%)   | 0 (0%)                   | 1 (1.4%)     | 0 (0%)                    | 0 (0%)       |
| Polyarthrititis | 1 (0.5%)     | 0 (0%)      | 1 (0.9%)   | 0 (0%)                   | 1 (1.4%)     | 0 (0%)                    | 0 (0%)       |

AIN, acute interstitial nephritis; CVD, cardiovascular disease; DM, diabetes mellitus; HLD, hyperlipidemia; HTN, hypertension; GU, genitourinary.

**Supplementary Table S2:** Predictors of response to infliximab within 3 months

| Covariate                        | Level       | Univariate logistic model |         | Multivariate logistic model |         |
|----------------------------------|-------------|---------------------------|---------|-----------------------------|---------|
|                                  |             | OR (95% CI)               | P-value | OR (95% CI)                 | P-value |
| Age at ICI initiation            | In 1 unit   | 0.994 (0.970-1.019)       | 0.6320  |                             |         |
| Baseline creatinine              | In 1 unit   | 1.901 (0.537-6.735)       | 0.3193  |                             |         |
| Time from ICI to irAE            | In 1 unit   | 1.036 (0.976-1.100)       | 0.2414  |                             |         |
| Time from irAE to infliximab     | In 1 unit   | 0.998 (0.991-1.006)       | 0.6576  |                             |         |
| Sex                              | Female      | 1.000                     |         |                             |         |
|                                  | Male        | 0.811 (0.382-1.720)       | 0.5847  |                             |         |
| ICI combination/monotherapy      | Monotherapy | 1.000                     |         | 1.000                       |         |
|                                  | Combo       | 1.896 (0.981-3.662)       | 0.0569  | 1.539 (0.762-3.107)         | 0.2295  |
| Cancer type                      | GU          | 1.000                     |         |                             |         |
|                                  | Melanoma    | 1.049 (0.443-2.485)       | 0.9127  |                             |         |
|                                  | Other       | 0.856 (0.337-2.177)       | 0.7448  |                             |         |
| Steroids before infliximab       | No          | 1.000                     |         |                             |         |
|                                  | Yes         | 0.692 (0.347-1.382)       | 0.2972  |                             |         |
| HTN                              | No          | 1.000                     |         |                             |         |
|                                  | Yes         | 0.639 (0.318-1.284)       | 0.2082  |                             |         |
| DM                               | No          | 1.000                     |         |                             |         |
|                                  | Yes         | 0.596 (0.293-1.212)       | 0.1529  |                             |         |
| HLD                              | No          | 1.000                     |         |                             |         |
|                                  | Yes         | 0.889 (0.450-1.757)       | 0.7348  |                             |         |
| CVD                              | No          | 1.000                     |         |                             |         |
|                                  | Yes         | 0.704 (0.321-1.543)       | 0.3805  |                             |         |
| Hypothyroid                      | No          | 1.000                     |         |                             |         |
|                                  | Yes         | 0.978 (0.481-1.992)       | 0.9521  |                             |         |
| Autoimmune disease               | No          | 1.000                     |         |                             |         |
|                                  | Yes         | 1.146 (0.297-4.418)       | 0.8427  |                             |         |
| AKI prior to infliximab          | No          | 1.000                     |         |                             |         |
|                                  | Yes         | 0.972 (0.453-2.086)       | 0.9416  |                             |         |
| AKI within 1 month of infliximab | No          | 1.000                     |         |                             |         |
|                                  | Yes         | 0.562 (0.284-1.114)       | 0.0988  |                             |         |
| Colitis                          | No          | 1.000                     |         | 1.000                       |         |
|                                  | Yes         | 4.887 (2.441-9.786)       | <.0001  | 4.59 (2.275-9.262)          | <.0001  |
| AIN                              | No          | 1.000                     |         |                             |         |
|                                  | Yes         | 0.453 (0.116-1.759)       | 0.2523  |                             |         |
| Pneumonitis                      | No          | 1.000                     |         |                             |         |
|                                  | Yes         | 0.213 (0.092-0.492)       | 0.0003  |                             |         |
| Encephalitis                     | No          | 1.000                     |         |                             |         |
|                                  | Yes         | 0.558 (0.090-3.442)       | 0.5297  |                             |         |
| Myocarditis                      | No          | 1.000                     |         |                             |         |
|                                  | Yes         | 0.453 (0.116-1.759)       | 0.2523  |                             |         |
| Myositis                         | No          | 1.000                     |         |                             |         |
|                                  | Yes         | 0.281 (0.072-1.094)       | 0.0671  |                             |         |

AKI, acute kidney injury; AIN, acute interstitial nephritis; CVD, cardiovascular disease; DM, diabetes mellitus; HLD, hyperlipidemia; HTN, hypertension; ICI, immune checkpoint inhibitor; irAE, immune-related adverse event.

**Supplementary Table S3:** Cohorts' progression-free survival (PFS) from infliximab initiation until disease progression or death, whichever occurred first; those who were alive without progression (based on response evaluation after infliximab initiation) or death were censored at the time of response evaluation), Melanoma (median PFS=9.7 months; 95% CI 6.7-17.6) and Genitourinary (median PFS=4.4 months; 95% CI 3.2-11.7)

| Covariate                    | Level            | Melanoma<br>(Median PFS=9.7 months; 95% CI 6.7-17.6) |         |                        |         | Genitourinary<br>(Median PFS=4.4 months; 95% CI 3.2-11.7) |         |                        |         |
|------------------------------|------------------|------------------------------------------------------|---------|------------------------|---------|-----------------------------------------------------------|---------|------------------------|---------|
|                              |                  | Univariate Cox model                                 |         | Multivariate Cox model |         | Univariate Cox model                                      |         | Multivariate Cox model |         |
|                              |                  | HR (95% CI)                                          | P-value | HR (95% CI)            | P-value | HR (95% CI)                                               | P-value | HR (95% CI)            | P-value |
| Age ICI                      | In 1 unit change | 1.006 (0.986-1.027)                                  | 0.5281  |                        |         | 1.010 (0.972-1.050)                                       | 0.6101  |                        |         |
| Baseline creatinine          | In 1 unit change | 0.446 (0.097-2.042)                                  | 0.2981  |                        |         | 0.459 (0.122-1.725)                                       | 0.2490  |                        |         |
| Time from ICI to irAE        | In 1 unit change | 0.982 (0.936-1.030)                                  | 0.4540  |                        |         | 0.905 (0.790-1.036)                                       | 0.1485  |                        |         |
| Time from irAE to infliximab | In 1 unit change | 0.998 (0.991-1.005)                                  | 0.6158  |                        |         | 0.975 (0.943-1.009)                                       | 0.1436  |                        |         |
| Sex                          | Female           | 1.000                                                |         |                        |         | 1.000                                                     |         |                        |         |
|                              | Male             | 0.671 (0.372-1.208)                                  | 0.1833  |                        |         | 0.877 (0.319-2.414)                                       | 0.7996  |                        |         |
| ICI combination /monotherapy | Monotherapy      | 1.000                                                |         | 1.000                  |         | 1.000                                                     |         | 1.000                  |         |
|                              | Combo            | 1.404 (0.711-2.773)                                  | 0.3289  | 1.156 (0.574-2.326)    | 0.6851  | 1.250 (0.533-2.934)                                       | 0.6077  | 1.370 (0.573-3.278)    | 0.4791  |
| Steroids before infliximab   | No               | 1.000                                                |         |                        |         | 1.000                                                     |         |                        |         |
|                              | Yes              | 0.522 (0.243-1.121)                                  | 0.0957  |                        |         | 1.216 (0.494-2.990)                                       | 0.6707  |                        |         |
| HTN                          | No               | 1.000                                                |         |                        |         | 1.000                                                     |         |                        |         |
|                              | Yes              | 1.118 (0.619-2.018)                                  | 0.7124  |                        |         | 1.234 (0.452-3.370)                                       | 0.6811  |                        |         |
| DM                           | No               | 1.000                                                |         |                        |         | 1.000                                                     |         |                        |         |
|                              | Yes              | 0.852 (0.418-1.738)                                  | 0.6602  |                        |         | 1.093 (0.471-2.538)                                       | 0.8358  |                        |         |
| HLD                          | No               | 1.000                                                |         |                        |         | 1.000                                                     |         |                        |         |
|                              | Yes              | 0.891 (0.451-1.763)                                  | 0.7410  |                        |         | 1.615 (0.654-3.988)                                       | 0.2984  |                        |         |
| CVD                          | No               | 1.000                                                |         | 1.000                  |         | 1.000                                                     |         |                        |         |
|                              | Yes              | 3.897 (1.998-7.601)                                  | <.0001  | 3.776 (1.907-7.475)    | 0.0001  | 1.172 (0.427-3.213)                                       | 0.7578  |                        |         |
| Hypothyroid                  | No               | 1.000                                                |         |                        |         | 1.000                                                     |         |                        |         |
|                              | Yes              | 0.524 (0.274-1.001)                                  | 0.0503  |                        |         | 0.507 (0.150-1.715)                                       | 0.2746  |                        |         |
| Autoimmune disease           | No               | 1.000                                                |         |                        |         | 1.000                                                     |         |                        |         |
|                              | Yes              | 0.939 (0.335-2.638)                                  | 0.9056  |                        |         | 0.939 (0.335-2.638)                                       | 0.9056  |                        |         |
| AKI prior to infliximab      | No               | 1.000                                                |         |                        |         | 1.000                                                     |         |                        |         |
|                              | Yes              | 1.660 (0.814-3.383)                                  | 0.1632  |                        |         | 0.931 (0.379-2.288)                                       | 0.8769  |                        |         |
| Colitis                      | No               | 1.000                                                |         |                        |         | 1.000                                                     |         | 1.000                  |         |
|                              | Yes              | 1.107 (0.531-2.306)                                  | 0.7871  |                        |         | 0.539 (0.235-1.239)                                       | 0.1458  | 0.516 (0.222-1.200)    | 0.1245  |
| AIN                          | No               | 1.000                                                |         |                        |         |                                                           |         |                        |         |

| Covariate    | Level | Melanoma<br>(Median PFS=9.7 months; 95% CI 6.7-17.6) |         |                        |         | Genitourinary<br>(Median PFS=4.4 months; 95% CI 3.2-11.7) |         |                        |         |
|--------------|-------|------------------------------------------------------|---------|------------------------|---------|-----------------------------------------------------------|---------|------------------------|---------|
|              |       | Univariate Cox model                                 |         | Multivariate Cox model |         | Univariate Cox model                                      |         | Multivariate Cox model |         |
|              |       | HR (95% CI)                                          | P-value | HR (95% CI)            | P-value | HR (95% CI)                                               | P-value | HR (95% CI)            | P-value |
|              |       |                                                      |         |                        |         |                                                           |         |                        |         |
|              | Yes   | 0.748 (0.223-2.503)                                  | 0.6374  |                        |         | -                                                         |         |                        |         |
|              | No    | 1.000                                                |         |                        |         | 1.000                                                     |         |                        |         |
| Pneumonitis  | Yes   | 1.008 (0.294-3.450)                                  | 0.9904  |                        |         | 2.987 (0.645-13.831)                                      | 0.1617  |                        |         |
|              | No    | 1.000                                                |         |                        |         | 1.000                                                     |         |                        |         |
| Encephalitis | Yes   | 0.980 (0.302-3.185)                                  | 0.9737  |                        |         | 0.980 (0.302-3.185)                                       | 0.9737  |                        |         |

**Supplementary Table S4:** Cox regression model for overall survival (OS) from infliximab initiation: melanoma (N=93, 43 deaths) and genitourinary cancers (N=37, 20 deaths)

| Covariate                    | Level            | Melanoma             |         |                        |         | Genitourinary        |         |                        |         |
|------------------------------|------------------|----------------------|---------|------------------------|---------|----------------------|---------|------------------------|---------|
|                              |                  | Univariate Cox model |         | Multivariate Cox model |         | Univariate Cox model |         | Multivariate Cox model |         |
|                              |                  | HR (95% CI)          | P-value | HR (95% CI)            | P-value | HR (95% CI)          | P-value | HR (95% CI)            | P-value |
| Age ICI                      | In 1 unit change | 1.010 (0.987-1.033)  | 0.4173  |                        |         | 1.025 (0.980-1.073)  | 0.2811  |                        |         |
| Baseline creatinine          | In 1 unit change | 1.015 (0.211-4.874)  | 0.9856  |                        |         | 0.527 (0.112-2.471)  | 0.4164  |                        |         |
| Time from ICI to irAE        | In 1 unit change | 1.001 (0.955-1.050)  | 0.9521  |                        |         | 0.924 (0.813-1.050)  | 0.2258  |                        |         |
| Time from irAE to infliximab | In 1 unit change | 0.995 (0.988-1.003)  | 0.2276  |                        |         | 0.983 (0.954-1.013)  | 0.2621  |                        |         |
| Sex                          | Female           | 1.000                |         |                        |         | 1.000                |         |                        |         |
|                              | Male             | 0.806 (0.436-1.489)  | 0.4911  |                        |         | 1.091 (0.358-3.323)  | 0.8776  |                        |         |
| ICI combination/monotherapy  | Monotherapy      | 1.000                |         | 1.000                  |         | 1.000                |         | 1.000                  |         |
|                              | Combo            | 1.266 (0.622-2.579)  | 0.5158  | 1.225 (0.600-2.501)    | 0.5767  | 0.741 (0.292-1.880)  | 0.5282  | 0.857 (0.333-2.206)    | 0.7489  |
| Steroids before infliximab   | No               | 1.000                |         |                        |         | 1.000                |         |                        |         |
|                              | Yes              | 0.525 (0.243-1.137)  | 0.1021  |                        |         | 1.904 (0.737-4.918)  | 0.1834  |                        |         |
| HTN                          | No               | 1.000                |         |                        |         | 1.000                |         |                        |         |
|                              | Yes              | 1.117 (0.605-2.063)  | 0.7229  |                        |         | 1.126 (0.369-3.440)  | 0.8347  |                        |         |
| DM                           | No               | 1.000                |         |                        |         | 1.000                |         |                        |         |
|                              | Yes              | 0.662 (0.317-1.384)  | 0.2733  |                        |         | 1.254 (0.502-3.131)  | 0.6279  |                        |         |
| HLD                          | No               | 1.000                |         |                        |         | 1.000                |         |                        |         |
|                              | Yes              | 0.829 (0.417-1.647)  | 0.5924  |                        |         | 1.160 (0.449-3.001)  | 0.7588  |                        |         |
| CVD                          | No               | 1.000                |         |                        |         | 1.000                |         |                        |         |
|                              | Yes              | 1.989 (0.997-3.969)  | 0.0511  |                        |         | 2.106 (0.734-6.041)  | 0.1659  |                        |         |
| Hypothyroid                  | No               | 1.000                |         |                        |         | 1.000                |         |                        |         |
|                              | Yes              | 0.589 (0.306-1.133)  | 0.1127  |                        |         | 0.574 (0.166-1.992)  | 0.3821  |                        |         |
| Autoimmune disease           | No               | 1.000                |         |                        |         | 1.000                |         |                        |         |
|                              | Yes              | 0.622 (0.149-2.591)  | 0.5142  |                        |         | 0.939 (0.335-2.638)  | 0.9056  |                        |         |
| Aki prior to infliximab      | No               | 1.000                |         | 1.000                  |         | 1.000                |         |                        |         |
|                              | Yes              | 2.140 (1.019-4.491)  | 0.0444  | 2.113 (1.005-4.441)    | 0.0485  | 0.700 (0.248-1.974)  | 0.5003  |                        |         |
| Colitis                      | No               | 1.000                |         |                        |         | 1.000                |         |                        |         |
|                              | Yes              | 0.651 (0.310-1.365)  | 0.2559  |                        |         | 0.610 (0.237-1.571)  | 0.3061  |                        |         |
| AIN                          | No               | 1.000                |         |                        |         |                      |         |                        |         |
|                              | Yes              | 1.489 (0.458-4.833)  | 0.5079  |                        |         | -                    |         |                        |         |
| Pneumonitis                  | No               | 1.000                |         |                        |         | 1.000                |         |                        |         |
|                              | Yes              | 1.729 (0.598-4.997)  | 0.3121  |                        |         | 1.087 (0.144-8.205)  | 0.9357  |                        |         |

| Covariate    | Level | Melanoma             |         |                        |         | Genitourinary         |         |                        |         |
|--------------|-------|----------------------|---------|------------------------|---------|-----------------------|---------|------------------------|---------|
|              |       | Univariate Cox model |         | Multivariate Cox model |         | Univariate Cox model  |         | Multivariate Cox model |         |
|              |       | HR (95% CI)          | P-value | HR (95% CI)            | P-value | HR (95% CI)           | P-value | HR (95% CI)            | P-value |
| Encephalitis | No    | 1.000                |         |                        |         | 1.000                 |         |                        |         |
|              | Yes   | 1.530 (0.470-4.976)  | 0.4798  |                        |         | 0.980 (0.302-3.185)   | 0.9737  |                        |         |
| Myocarditis  | No    |                      |         |                        |         | 1.000                 |         |                        |         |
|              | Yes   |                      |         |                        |         | 2.859 (0.926-8.825)   | 0.0677  |                        |         |
| Myositis     | No    |                      |         |                        |         | 1.000                 |         | 1.000                  |         |
|              | Yes   |                      |         |                        |         | 10.978 (2.871-41.978) | 0.0005  | 10.638 (2.749-41.162)  | 0.0006  |

There were only 2 myocarditis AEs and 1 myositis AE, and these variables are not included in univariate Cox regression models.
